# Supplementary material for: Association between bisphosphonate use and COVID-19 related outcomes
Source: eLife. 2023 Aug 3;12:e79548. doi: 10.7554/eLife.79548 (PMC10691801; doi:10.7554/eLife.79548)
Supplement: Figure 2—source data 1. [file elife-79548-fig2-data1.xlsx]

## Sheet: Table
					Figure 2, source data 1: Primary Analysis Cohort, COVID-19-Related Outcomes
						Incidence of outcome events by exposure to bisphosphonates		Odds of Event
						Number of events / non-user patients	Number of events / user patients	Crude OR (95%CI)	Adjusted OR (95%CI)
						(%)	(%)
					(i) All Regions Combined
					SARS-CoV-2 Test	22,948 / 450,366	5,189 / 450,366	0.22	0.22
						(5.1)	(1.2)	(0.21-0.22)	(0.21-0.23)
					COVID-19 Diagnosis	13,265 / 450,366	3,024 / 450,366	0.22	0.23
						(2.9)	(0.7)	(0.21-0.23)	(0.22-0.24)
					COVID-19 Hospitalization	2,995 / 450,366	715 / 450,366	0.24	0.26
Enter Values Below						(0.7)	(0.2)	(0.22-0.26)	(0.24-0.29)
					(ii) Region = Northeast
	OR	LOWER	UPPER		SARS-CoV-2 Test	7,147 / 119,494	1,684 / 119,494	0.22	0.23
Full SARS-CoV-2 Test	0.218887	0.211972	0.226005			(6.0)	(1.4)	(0.21-0.24)	(0.21-0.24)
Full COVID-19 Diagnosis	0.230363	0.2208	0.240268		COVID-19 Diagnosis	6,242 / 119,494	1,578 / 119,494	0.24	0.25
Full COVID-19 Hospitalization	0.261636	0.239836	0.285019			(5.2)	(1.3)	(0.23-0.26)	(0.23-0.26)
NE SARS-CoV-2 Test	0.225102	0.212567	0.238258		COVID-19 Hospitalization	1,191 / 119,494	314 / 119,494	0.26	0.29
NE COVID-19 Diagnosis	0.24828	0.233727	0.263606			(1.0)	(0.3)	(0.23-0.30)	(0.26-0.33)
NE COVID-19 Hospitalization	0.293288	0.25643	0.334439		(iii) Region = Midwest
MW SARS-CoV-2 Test	0.23726	0.218953	0.256841		SARS-CoV-2 Test	3,583 / 75,901	868 / 75,901	0.23	0.24
MW COVID-19 Diagnosis	0.243193	0.215995	0.273159			(4.7)	(1.1)	(0.22-0.25)	(0.22-0.26)
MW COVID-19 Hospitalization	0.2572	0.208004	0.316668		COVID-19 Diagnosis	1,716 / 75,901	383 / 75,901	0.22	0.24
SO SARS-CoV-2 Test	0.220557	0.208045	0.233704			(2.3)	(0.5)	(0.20-0.25)	(0.22-0.27)
SO COVID-19 Diagnosis	0.221308	0.201977	0.242101		COVID-19 Hospitalization	515 / 75,901	121 / 75,901	0.23	0.26
SO COVID-19 Hospitalization	0.264715	0.232748	0.300262			(0.7)	(0.2)	(0.19-0.29)	(0.21-0.32)
WE SARS-CoV-2 Test	0.195812	0.182629	0.209779		(iv) Region = South
WE COVID-19 Diagnosis	0.186057	0.166943	0.206863		SARS-CoV-2 Test	6,865 / 159,704	1,553 / 159,704	0.22	0.22
WE COVID-19 Hospitalization	0.198612	0.160815	0.245293			(4.3)	(1.0)	(0.21-0.23)	(0.21-0.23)
NY SARS-CoV-2 Test	0.261114	0.239476	0.284364		COVID-19 Diagnosis	2,911 / 159,704	624 / 159,704	0.21	0.22
NY COVID-19 Diagnosis	0.280271	0.25702	0.305288			(1.8)	(0.4)	(0.19-0.23)	(0.20-0.24)
NY COVID-19 Hospitalization	0.325921	0.265219	0.398958		COVID-19 Hospitalization	682 / 159,704	167 / 159,704	0.24	0.26
						(0.4)	(0.1)	(0.21-0.29)	(0.23-0.30)
					(v) Region = West
					SARS-CoV-2 Test	5,353 / 95,267	1,084 / 95,267	0.19	0.20
						(5.6)	(1.1)	(0.18-0.21)	(0.18-0.21)
					COVID-19 Diagnosis	2,396 / 95,267	439 / 95,267	0.18	0.19
						(2.5)	(0.5)	(0.16-0.20)	(0.17-0.21)
					COVID-19 Hospitalization	607 / 95,267	113 / 95,267	0.19	0.20
						(0.6)	(0.1)	(0.15-0.23)	(0.16-0.25)
					(vi) Region = New York State
					SARS-CoV-2 Test	2,826 / 49,862	772 / 49,862	0.26	0.26
						(5.7)	(1.5)	(0.24-0.28)	(0.24-0.28)
					COVID-19 Diagnosis	2,796 / 49,862	811 / 49,862	0.27	0.28
						(5.6)	(1.6)	(0.26-0.30)	(0.26-0.31)
					COVID-19 Hospitalization	486 / 49,862	136 / 49,862	0.28	0.33
						(1.0)	(0.3)	(0.23-0.34)	(0.27-0.40)

## Sheet: Figure
Full SARS-CoV-2 Test	0.218887	23
	0.211972	23
	0.226005	23
Full COVID-19 Diagnosis	0.230363	22
	0.2208	22
	0.240268	22
Full COVID-19 Hospitalization	0.261636	21
	0.239836	21
	0.285019	21
NE SARS-CoV-2 Test	0.225102	19
	0.212567	19
	0.238258	19
NE COVID-19 Diagnosis	0.24828	18
	0.233727	18
	0.263606	18
NE COVID-19 Hospitalization	0.293288	17		Enter Values Below
	0.25643	17
	0.334439	17			OR	LOWER	UPPER
MW SARS-CoV-2 Test	0.23726	15		Full SARS-CoV-2 Test	0.218887	0.211972	0.226005
	0.218953	15		Full COVID-19 Diagnosis	0.230363	0.2208	0.240268
	0.256841	15		Full COVID-19 Hospitalization	0.261636	0.239836	0.285019
MW COVID-19 Diagnosis	0.243193	14		NE SARS-CoV-2 Test	0.225102	0.212567	0.238258
	0.215995	14		NE COVID-19 Diagnosis	0.24828	0.233727	0.263606
	0.273159	14		NE COVID-19 Hospitalization	0.293288	0.25643	0.334439
MW COVID-19 Hospitalization	0.2572	13		MW SARS-CoV-2 Test	0.23726	0.218953	0.256841
	0.208004	13		MW COVID-19 Diagnosis	0.243193	0.215995	0.273159
	0.316668	13		MW COVID-19 Hospitalization	0.2572	0.208004	0.316668
SO SARS-CoV-2 Test	0.220557	11		SO SARS-CoV-2 Test	0.220557	0.208045	0.233704
	0.208045	11		SO COVID-19 Diagnosis	0.221308	0.201977	0.242101
	0.233704	11		SO COVID-19 Hospitalization	0.264715	0.232748	0.300262
SO COVID-19 Diagnosis	0.221308	10		WE SARS-CoV-2 Test	0.195812	0.182629	0.209779
	0.201977	10		WE COVID-19 Diagnosis	0.186057	0.166943	0.206863
	0.242101	10		WE COVID-19 Hospitalization	0.198612	0.160815	0.245293
SO COVID-19 Hospitalization	0.264715	9		NY SARS-CoV-2 Test	0.261114	0.239476	0.284364
	0.232748	9		NY COVID-19 Diagnosis	0.280271	0.25702	0.305288
	0.300262	9		NY COVID-19 Hospitalization	0.325921	0.265219	0.398958
WE SARS-CoV-2 Test	0.195812	7
	0.182629	7
	0.209779	7
WE COVID-19 Diagnosis	0.186057	6
	0.166943	6
	0.206863	6
WE COVID-19 Hospitalization	0.198612	5
	0.160815	5
	0.245293	5
NY SARS-CoV-2 Test	0.261114	3
	0.239476	3
	0.284364	3
NY COVID-19 Diagnosis	0.280271	2
	0.25702	2
	0.305288	2
NY COVID-19 Hospitalization	0.325921	1
	0.265219	1
	0.398958	1

## Sheet: Sheet2
	OR	LOWER	UPPER
Full SARS-CoV-2 Test	0.218887	0.211972	0.226005
Full COVID-19 Diagnosis	0.230363	0.2208	0.240268
Full COVID-19 Hospitalization	0.261636	0.239836	0.285019
NE SARS-CoV-2 Test	0.225102	0.212567	0.238258
NE COVID-19 Diagnosis	0.24828	0.233727	0.263606
NE COVID-19 Hospitalization	0.293288	0.25643	0.334439
MW SARS-CoV-2 Test	0.23726	0.218953	0.256841
MW COVID-19 Diagnosis	0.243193	0.215995	0.273159
MW COVID-19 Hospitalization	0.2572	0.208004	0.316668
SO SARS-CoV-2 Test	0.220557	0.208045	0.233704
SO COVID-19 Diagnosis	0.221308	0.201977	0.242101
SO COVID-19 Hospitalization	0.264715	0.232748	0.300262
WE SARS-CoV-2 Test	0.195812	0.182629	0.209779
WE COVID-19 Diagnosis	0.186057	0.166943	0.206863
WE COVID-19 Hospitalization	0.198612	0.160815	0.245293
NY SARS-CoV-2 Test	0.261114	0.239476	0.284364
NY COVID-19 Diagnosis	0.280271	0.25702	0.305288
NY COVID-19 Hospitalization	0.325921	0.265219	0.398958
