# Supplementary material for: Association between bisphosphonate use and COVID-19 related outcomes
Source: eLife. 2023 Aug 3;12:e79548. doi: 10.7554/eLife.79548 (PMC10691801; doi:10.7554/eLife.79548)
Supplement: Figure 3—source data 1. [file elife-79548-fig3-data1.xlsx]

## Sheet: Table
			Figure 3: Primary Analysis Cohort by Timing of Bisphosphonate Dosing, COVID-19-Related Outcomes
				Incidence of outcome events by exposure to bisphosphonates		Odds of Event
				Number of events / non-user patients	Number of events / user patients	Crude OR (95%CI)	Adjusted OR (95%CI)
				(%)	(%)
			(a,i) Alendronic acid dosed full study period
			SARS-CoV-2 Test	5,191 / 107,805	982 / 107,805	0.18	0.19
				(4.8)	(0.9)	(0.17-0.19)	(0.17-0.20)
			COVID-19 Diagnosis	3,229 / 107,805	643 / 107,805	0.19	0.20
				(3.0)	(0.6)	(0.18-0.21)	(0.18-0.22)
			COVID-19 Hospitalization	724 / 107,805	139 / 107,805	0.19	0.20
				(0.7)	(0.1)	(0.16-0.23)	(0.17-0.25)
			(a,ii) Zoledronic acid dosed Q3/Q4 2019
			SARS-CoV-2 Test	1,831 / 30,718	560 / 30,718	0.29	0.29
				(6.0)	(1.8)	(0.27-0.32)	(0.26-0.32)
			COVID-19 Diagnosis	955 / 30,718	181 / 30,718	0.18	0.23
				(3.1)	(0.6)	(0.16-0.22)	(0.19-0.27)
			COVID-19 Hospitalization	218 / 30,718	41 / 30,718	0.19	0.28
				(0.7)	(0.1)	(0.13-0.26)	(0.19-0.40)
			(b,i) Alendronic acid dosed Q1/Q2 2019
			SARS-CoV-2 Test	1,518 / 30,306	382 / 30,306	0.24	0.24
				(5.0)	(1.3)	(0.22-0.27)	(0.22-0.28)
			COVID-19 Diagnosis	886 / 30,306	210 / 30,306	0.23	0.24
				(2.9)	(0.7)	(0.20-0.27)	(0.20-0.28)
			COVID-19 Hospitalization	206 / 30,306	49 / 30,306	0.24	0.26
				(0.7)	(0.2)	(0.17-0.32)	(0.24-0.28)
			(b,ii) Zoledronic acid dosed January/February 2019
			SARS-CoV-2 Test	156 / 2,829	45 / 2,829	0.28	0.24
				(5.5)	(1.6)	(0.20-0.39)	(0.17-0.36)
			COVID-19 Diagnosis	80 / 2,829	25 / 2,829	0.31	0.32
				(2.8)	(0.9)	(0.19-0.48)	(0.19-0.54)
			COVID-19 Hospitalization	19 / 2,829	7 / 2,829	0.37	0.52
				(0.7)	(0.2)	(0.15-0.87)	(0.20-1.40)
			(c,i) Alendronic acid dosed February 2019
			SARS-CoV-2 Test	416 / 8,465	95 / 8,465	0.22	0.22
				(4.9)	(1.1)	(0.18-0.28)	(0.18-0.28)
			COVID-19 Diagnosis	247 / 8,465	62 / 8,465	0.25	0.25
				(2.9)	(0.7)	(0.19-0.32)	(0.19-0.34)
			COVID-19 Hospitalization	52 / 8,465	11 / 8,465	0.21	0.25
				(0.6)	(0.1)	(0.11-0.40)	(0.13-0.50)
			(c,ii) Zoledronic acid dosed February 2019
			SARS-CoV-2 Test	149 / 2,398	48 / 2,398	0.31	0.32
				(6.2)	(2.0)	(0.22-0.43)	(0.22-0.46)
			COVID-19 Diagnosis	73 / 2,398	15 / 2,398	0.20	0.25
				(3.0)	(0.6)	(0.11-0.35)	(0.13-0.46)
			COVID-19 Hospitalization	13 / 2,398	4 / 2,398	0.31	0.49
				(0.5)	(0.2)	(0.10-0.94)	(0.13-1.88)

## Sheet: Figure
Oral Alendronic Acid Use Full Study Period SARS-CoV-2 Test	0.187552	23
	0.174593	23
	0.201292	23
Oral Alendronic Acid Use Full Study Period COVID-19 Diagnosis	0.198891	22
	0.181827	22
	0.21723	22
Oral Alendronic Acid Use Full Study Period COVID-19 Hospitalization	0.203864	21
	0.1682	21
	0.245343	21
Zoledronic Acid Use Q3/Q4 2019 SARS-CoV-2 Test	0.290777	19
	0.261323	19
	0.323098	19
Zoledronic Acid Use Q3/Q4 2019 COVID-19 Diagnosis	0.22766	18
	0.19031	18
	0.271064	18
Zoledronic Acid Use Q3/Q4 2019 COVID-19 Hospitalization	0.279487	17		Enter Values Below
	0.193902	17
	0.402846	17			OR	LOWER	UPPER
Oral Alendronic Acid Use Q1/Q2 2019 SARS-CoV-2 Test	0.244975	15		Oral Alendronic Acid Use Full Study Period SARS-CoV-2 Test	0.187552	0.174593	0.201292
	0.217643	15		Oral Alendronic Acid Use Full Study Period COVID-19 Diagnosis	0.198891	0.181827	0.21723
	0.275408	15		Oral Alendronic Acid Use Full Study Period COVID-19 Hospitalization	0.203864	0.1682	0.245343
Oral Alendronic Acid Use Q1/Q2 2019 COVID-19 Diagnosis	0.235581	14		Zoledronic Acid Use Q3/Q4 2019 SARS-CoV-2 Test	0.290777	0.261323	0.323098
	0.200789	14		Zoledronic Acid Use Q3/Q4 2019 COVID-19 Diagnosis	0.22766	0.19031	0.271064
	0.275188	14		Zoledronic Acid Use Q3/Q4 2019 COVID-19 Hospitalization	0.279487	0.193902	0.402846
Oral Alendronic Acid Use Q1/Q2 2019 COVID-19 Hospitalization	0.25702	13		Oral Alendronic Acid Use Q1/Q2 2019 SARS-CoV-2 Test	0.244975	0.217643	0.275408
	0.238521	13		Oral Alendronic Acid Use Q1/Q2 2019 COVID-19 Diagnosis	0.235581	0.200789	0.275188
	0.276678	13		Oral Alendronic Acid Use Q1/Q2 2019 COVID-19 Hospitalization	0.25702	0.238521	0.276678
Zoledronic Acid Use Jan/Feb 2019 SARS-CoV-2 Test	0.242537	11		Zoledronic Acid Use Jan/Feb 2019 SARS-CoV-2 Test	0.242537	0.165398	0.355688
	0.165398	11		Zoledronic Acid Use Jan/Feb 2019 COVID-19 Diagnosis	0.317842	0.188411	0.536187
	0.355688	11		Zoledronic Acid Use Jan/Feb 2019 COVID-19 Hospitalization	0.522986	0.195167	1.4013
Zoledronic Acid Use Jan/Feb 2019 COVID-19 Diagnosis	0.317842	10		Oral Alendronic Acid Use Feb/2020 SARS-CoV-2 Test	0.22481	0.176824	0.284762
	0.188411	10		Oral Alendronic Acid Use Feb/2020 COVID-19 Diagnosis	0.254539	0.188454	0.343764
	0.536187	10		Oral Alendronic Acid Use Feb/2020 COVID-19 Hospitalization	0.25431	0.128413	0.503687
Zoledronic Acid Use Jan/Feb 2019 COVID-19 Hospitalization	0.522986	9		New Zoledronic Acid Use Feb/2020 SARS-CoV-2 Test	0.315058	0.217824	0.455695
	0.195167	9		New Zoledronic Acid Use Feb/2020 COVID-19 Diagnosis	0.24576	0.130445	0.463059
	1.4013	9		New Zoledronic Acid Use Feb/2020 COVID-19 Hospitalization	0.486412	0.125556	1.88419
Oral Alendronic Acid Use Feb/2020 SARS-CoV-2 Test	0.22481	7
	0.176824	7
	0.284762	7
Oral Alendronic Acid Use Feb/2020 COVID-19 Diagnosis	0.254539	6
	0.188454	6
	0.343764	6
Oral Alendronic Acid Use Feb/2020 COVID-19 Hospitalization	0.25431	5
	0.128413	5
	0.503687	5
New Zoledronic Acid Use Feb/2020 SARS-CoV-2 Test	0.315058	3
	0.217824	3
	0.455695	3
New Zoledronic Acid Use Feb/2020 COVID-19 Diagnosis	0.24576	2
	0.130445	2
	0.463059	2
New Zoledronic Acid Use Feb/2020 COVID-19 Hospitalization	0.486412	1
	0.125556	1
	1.88419	1

## Sheet: Sheet2
	OR	LOWER	UPPER
Oral Alendronic Acid Use Full Study Period SARS-CoV-2 Test	0.187552	0.174593	0.201292
Oral Alendronic Acid Use Full Study Period COVID-19 Diagnosis	0.198891	0.181827	0.21723
Oral Alendronic Acid Use Full Study Period COVID-19 Hospitalization	0.203864	0.1682	0.245343
Zoledronic Acid Use Q3/Q4 2019 SARS-CoV-2 Test	0.290777	0.261323	0.323098
Zoledronic Acid Use Q3/Q4 2019 COVID-19 Diagnosis	0.22766	0.19031	0.271064
Zoledronic Acid Use Q3/Q4 2019 COVID-19 Hospitalization	0.279487	0.193902	0.402846
Oral Alendronic Acid Use Q1/Q2 2019 SARS-CoV-2 Test	0.244975	0.217643	0.275408
Oral Alendronic Acid Use Q1/Q2 2019 COVID-19 Diagnosis	0.235581	0.200789	0.275188
Oral Alendronic Acid Use Q1/Q2 2019 COVID-19 Hospitalization	0.25702	0.238521	0.276678
Zoledronic Acid Use Jan/Feb 2019 SARS-CoV-2 Test	0.242537	0.165398	0.355688
Zoledronic Acid Use Jan/Feb 2019 COVID-19 Diagnosis	0.317842	0.188411	0.536187
Zoledronic Acid Use Jan/Feb 2019 COVID-19 Hospitalization	0.522986	0.195167	1.4013
Oral Alendronic Acid Use Feb/2020 SARS-CoV-2 Test	0.22481	0.176824	0.284762
Oral Alendronic Acid Use Feb/2020 COVID-19 Diagnosis	0.254539	0.188454	0.343764
Oral Alendronic Acid Use Feb/2020 COVID-19 Hospitalization	0.25431	0.128413	0.503687
New Zoledronic Acid Use Feb/2020 SARS-CoV-2 Test	0.315058	0.217824	0.455695
New Zoledronic Acid Use Feb/2020 COVID-19 Diagnosis	0.24576	0.130445	0.463059
New Zoledronic Acid Use Feb/2020 COVID-19 Hospitalization	0.486412	0.125556	1.88419
