# Supplementary material for: Association between bisphosphonate use and COVID-19 related outcomes
Source: eLife. 2023 Aug 3;12:e79548. doi: 10.7554/eLife.79548 (PMC10691801; doi:10.7554/eLife.79548)
Supplement: Figure 4—source data 1. [file elife-79548-fig4-data1.xlsx]

## Sheet: Figure
									Figure 4, source data 1 for Figure 4a: Bone-Rx Cohort COVID-19-Related Outcomes
										Incidence of outcome events by exposure to bisphosphonates		Odds of Event
										Number of events / non-user patients	Number of events / user patients	Crude OR (95%CI)	Adjusted OR (95%CI)
										(%)	(%)
									All Regions Combined
									SARS-CoV-2 Test	2,438 / 50,498	760 / 50,498	0.30	0.31
										(4.8)	(1.5)	(0.28-0.33)	(0.28-0.33)
									COVID-19 Diagnosis	1,307 / 50,498	461 / 50,498	0.35	0.35
										(2.6)	(0.9)	(0.31-0.39)	(0.31-0.38)
									COVID-19 Hospitalization	276 / 50,498	123 / 50,498	0.44	0.45
										(0.5)	(0.2)	(0.36-0.55)	(0.36-0.56)
				Enter Values Below
					OR	LOWER	UPPER
				Full SARS-CoV-2 Test	0.306052	0.281394	0.332505
				Full COVID-19 Diagnosis	0.345314	0.309344	0.384774
				Full COVID-19 Hospitalization	0.449958	0.361932	0.558054
0	0	7
	0	7			0.5	0.2	1.5
	0	7
0	0	6
	0	6
	0	6
0	0	5			0.306052	0.281394	0.332505
	0	5			0.345314	0.309344	0.384774
	0	5			0.449958	0.361932	0.558054
Full SARS-CoV-2 Test	0.306052	3
	0.281394	3
	0.332505	3
Full COVID-19 Diagnosis	0.345314	2
	0.309344	2
	0.384774	2
Full COVID-19 Hospitalization	0.449958	1
	0.361932	1
	0.558054	1
