# Supplementary material for: Association between bisphosphonate use and COVID-19 related outcomes
Source: eLife. 2023 Aug 3;12:e79548. doi: 10.7554/eLife.79548 (PMC10691801; doi:10.7554/eLife.79548)
Supplement: Figure 4—source data 2. [file elife-79548-fig4-data2.xlsx]

## Sheet: Figure
									Figure 4, source data 2 for Figure 4b: Osteo-Dx-Rx Cohort COVID-19-Related Outcomes
										Incidence of outcome events by exposure to bisphosphonates		Odds of Event
										Number of events / non-user patients	Number of events / user patients	Crude OR (95%CI)	Adjusted OR (95%CI)
										(%)	(%)
									All Regions Combined
									SARS-CoV-2 Test	395 / 7,949	115 / 7,949	0.28	0.28
										(5.0)	(1.4)	(0.23-0.35)	(0.23-0.35)
									COVID-19 Diagnosis	300 / 7,949	121 / 7,949	0.40	0.40
										(3.8)	(1.5)	(0.32-0.49)	(0.32-0.49)
									COVID-19 Hospitalization	47 / 7,949	21 / 7,949	0.45	0.45
										(0.6)	(0.3)	(0.27-0.75)	(0.26-0.75)
				Enter Values Below
					OR	LOWER	UPPER
				Full SARS-CoV-2 Test	0.282606	0.227843	0.347844
				Full COVID-19 Diagnosis	0.395818	0.317969	0.489731
				Full COVID-19 Hospitalization	0.449015	0.261479	0.745798
0	0	7
	0	7			0.5	0.2	1.5
	0	7
0	0	6
	0	6
	0	6			0.282606	0.227843	0.347844
0	0	5			0.395818	0.317969	0.489731
	0	5			0.449015	0.261479	0.745798
	0	5
Full SARS-CoV-2 Test	0.282606	3
	0.227843	3
	0.347844	3
Full COVID-19 Diagnosis	0.395818	2
	0.317969	2
	0.489731	2
Full COVID-19 Hospitalization	0.449015	1
	0.261479	1
	0.745798	1
