# Supplementary material for: Association between bisphosphonate use and COVID-19 related outcomes
Source: eLife. 2023 Aug 3;12:e79548. doi: 10.7554/eLife.79548 (PMC10691801; doi:10.7554/eLife.79548)
Supplement: Figure 5—source data 1. [file elife-79548-fig5-data1.xlsx]

## Sheet: Table
			Figure 5, source data 1: Positive Control Outcomes by Primary, Bone-Rx, and Osteo-Dx-Rx Cohorts
				Incidence of outcome events by exposure to bisphosphonates		Odds of Event
				Number of events / non-user patients	Number of events / user patients	Crude OR (95%CI)	Adjusted OR (95%CI)
				(%)	(%)
			Acute Bronchitis (Q3/Q4 2019)
			Primary Cohort	19,613 / 326,638	4,525 / 326,638	0.22	0.23
				(6.0)	(1.4)	(0.21-0.23)	(0.22-0.23)
			Bone-Rx Cohort	2,015 / 36,282	639 / 36,282	0.30	0.31
				(5.6)	(1.8)	(0.28-0.33)	(0.29-0.34)
			Osteo-Dx-Rx Cohort	361 / 5,591	103 / 5,591	0.27	0.28
				(6.5)	(1.8)	(0.22-0.34)	(0.24-0.32)
		13	Pneumonia (Q3/Q4 2019)
		12	Primary Cohort	16,160 / 326,638	4,942 / 326,638	0.30	0.32
		12		(5.0)	(1.5)	(0.29-0.30)	(0.31-0.34)
		12	Bone-Rx Cohort	2,522 / 36,282	996 / 36,282	0.38	0.40
		12		(7.0)	(2.7)	(0.35-0.41)	(0.37-0.43)
		12	Osteo-Dx-Rx Cohort	288 / 5,591	101 / 5,591	0.34	0.36
		12		(5.2)	(1.8)	(0.27-0.43)	(0.33-0.39)
		10
		10

## Sheet: Figure
0	0	15
	0	15
	0	15
0	0	14		Enter Values Below
	0	14
	0	14			OR	LOWER	UPPER
0	0	13
	0	13
	0	13
0	0	11
	0	11
	0	11
0	0	10		Acute Bronchitis (Q3/Q4 2019) primary	0.22614	0.21845	0.234055
	0	10		Acute Bronchitis (Q3/Q4 2019) bone rx	0.31	0.29	0.34
	0	10		Acute Bronchitis (Q3/Q4 2019) osteo-dx-rx	0.27751	0.238044	0.322259
0	0	9		Acute Pneumonia (Q3/Q4 2019) primary	0.323745	0.312735	0.335075
	0	9		Acute Pneumonia (Q3/Q4 2019) bone rx	0.4	0.37	0.43
	0	9		Acute Pneumonia (Q3/Q4 2019) osteo-dx-rx	0.362004	0.332206	0.394199
Acute Bronchitis (Q3/Q4 2019) primary	0.22614	7
	0.21845	7
	0.234055	7
Acute Bronchitis (Q3/Q4 2019) bone rx	0.31	6
	0.29	6
	0.34	6
Acute Bronchitis (Q3/Q4 2019) osteo-dx-rx	0.27751	5
	0.238044	5
	0.322259	5
Acute Pneumonia (Q3/Q4 2019) primary	0.323745	3
	0.312735	3
	0.335075	3
Acute Pneumonia (Q3/Q4 2019) bone rx	0.4	2
	0.37	2
	0.43	2
Acute Pneumonia (Q3/Q4 2019) osteo-dx-rx	0.362004	1
	0.332206	1
	0.394199	1

## Sheet: Sheet2
	OR	LOWER	UPPER
Acute Bronchitis (Q3/Q4 2019) primary	0.22614	0.21845	0.234055
Acute Bronchitis (Q3/Q4 2019) bone rx	0.31	0.29	0.34
Acute Bronchitis (Q3/Q4 2019) osteo-dx-rx	0.27751	0.238044	0.322259
Acute Pneumonia (Q3/Q4 2019) primary	0.323745	0.312735	0.335075
Acute Pneumonia (Q3/Q4 2019) bone rx	0.4	0.37	0.43
Acute Pneumonia (Q3/Q4 2019) osteo-dx-rx	0.362004	0.332206	0.394199
