# Supplementary material for: Association between bisphosphonate use and COVID-19 related outcomes
Source: eLife. 2023 Aug 3;12:e79548. doi: 10.7554/eLife.79548 (PMC10691801; doi:10.7554/eLife.79548)
Supplement: Figure 6—source data 1. [file elife-79548-fig6-data1.xlsx]

## Sheet: Table
			Figure 6, source data 1 for Figure 6B: COVID-19-Related Outcomes by Statin Use Overall & Sub-Stratified by BP Use
				Incidence of outcome events by drug exposure		Odds of Event
				Number of events / non-user patients	Number of events / user patients	Crude OR (95%CI)	Adjusted OR (95%CI)
				(%)	(%)
			Outcomes by Statin Use
			SARS-CoV-2 Test	80,506 / 1,436,300	72,629 / 1,436,300	0.90	0.87
				(5.6)	(5.1)	(0.89-0.91)	(0.86-0.87)
			COVID-19 Diagnosis	45,526 / 1,436,300	41,468 / 1,436,300	0.91	0.79
				(3.2)	(2.9)	(0.90-0.92)	(0.78-0.81)
			COVID-19 Hospitalization	9,228 / 1,436,300	10,339 / 1,436,300	1.12	0.99
				(0.6)	(0.7)	(1.09-1.15)	(0.96-1.02)
			Outcomes by BP Use Among Statin Users
			SARS-CoV-2 Test	9,943 / 213,480	2,334 / 213,480	0.23	0.23
				(4.7)	(1.1)	(0.22-0.24)	(0.22-0.24)
			COVID-19 Diagnosis	6,204 / 213,480	1,662 / 213,480	0.26	0.27
				(2.9)	(0.8)	(0.25-0.28)	(0.25-0.29)
			COVID-19 Hospitalization	1,610 / 213,480	420 / 213,480	0.26	0.28
				(0.8)	(0.2)	(0.23-0.29)	(0.25-0.32)
		13	Outcomes by BP Use Among Statin Non-users
		12	SARS-CoV-2 Test	6,195 / 124,716	1,466 / 124,716	0.23	0.24
		12		(5.0)	(1.2)	(0.21-0.24)	(0.22-0.25)
		12	COVID-19 Diagnosis	3,604 / 124,716	768 / 124,716	0.21	0.23
		12		(2.9)	(0.6)	(0.19-0.23)	(0.21-0.25)
		12	COVID-19 Hospitalization	770 / 124,716	160 / 124,716	0.21	0.25
		12		(0.6)	(0.1)	(0.17-0.25)	(0.21-0.30)
		10
		10

## Sheet: Figure
0	0	23
	0	23
	0	23
0	0	22
	0	22
	0	22
0	0	21
	0	21
	0	21
0	0	19
	0	19
	0	19
0	0	18
	0	18
	0	18
0	0	17		Enter Values Below
	0	17
	0	17			OR	LOWER	UPPER
0	0	15
	0	15
	0	15
0	0	14
	0	14
	0	14
0	0	13
	0	13
	0	13
by Statin Test	0.865195	11		by Statin Test	0.865195	0.855987	0.87459
	0.855987	11		by Statin Dx	0.793819	0.782626	0.805171
	0.87459	11		by Statin InPt	0.989456	0.960982	1.01888
by Statin Dx	0.793819	10		Statin Users Test	0.22839	0.217621	0.239596
	0.782626	10		Statin Users Dx	0.269982	0.254616	0.286104
	0.805171	10		Statin Users InPt	0.284165	0.253295	0.318128
by Statin InPt	0.989456	9		Statin nonUsers Test	0.235157	0.221109	0.249974
	0.960982	9		Statin nonUsers Dx	0.229535	0.210873	0.249524
	1.01888	9		Statin nonUsers InPt	0.247759	0.206573	0.297126
Statin Users Test	0.22839	7
	0.217621	7
	0.239596	7
Statin Users Dx	0.269982	6
	0.254616	6
	0.286104	6
Statin Users InPt	0.284165	5
	0.253295	5
	0.318128	5
Statin nonUsers Test	0.235157	3
	0.221109	3
	0.249974	3
Statin nonUsers Dx	0.229535	2
	0.210873	2
	0.249524	2
Statin nonUsers InPt	0.247759	1
	0.206573	1
	0.297126	1

## Sheet: Sheet2
	OR	LOWER	UPPER
by Statin Test	0.865195	0.855987	0.87459
by Statin Dx	0.793819	0.782626	0.805171
by Statin InPt	0.989456	0.960982	1.01888
Statin Users Test	0.22839	0.217621	0.239596
Statin Users Dx	0.269982	0.254616	0.286104
Statin Users InPt	0.284165	0.253295	0.318128
Statin nonUsers Test	0.235157	0.221109	0.249974
Statin nonUsers Dx	0.229535	0.210873	0.249524
Statin nonUsers InPt	0.247759	0.206573	0.297126
