# Supplementary material for: Association between bisphosphonate use and COVID-19 related outcomes
Source: eLife. 2023 Aug 3;12:e79548. doi: 10.7554/eLife.79548 (PMC10691801; doi:10.7554/eLife.79548)
Supplement: Figure 6—source data 2. [file elife-79548-fig6-data2.xlsx]

## Sheet: Table
			Figure 6, source data 2 for Figure 6C: COVID-19-Related Outcomes by Antihypertensive Use Overall & Sub-Stratified by BP Use
				Incidence of outcome events by drug exposure		Odds of Event
				Number of events / non-user patients	Number of events / user patients	Crude OR (95%CI)	Adjusted OR (95%CI)
				(%)	(%)
			Outcomes by Antihypertensive Use
			SARS-CoV-2 Test	106,990 / 1,786,001	98,075 / 1,786,001	0.91	0.87
				(6.0)	(5.5)	(0.90-0.92)	(0.86-0.88)
			COVID-19 Diagnosis	57,001 / 1,786,001	49,458 / 1,786,001	0.86	0.75
				(3.2)	(2.8)	(0.85-0.87)	(0.74-0.76)
			COVID-19 Hospitalization	10,147 / 1,786,001	11,505 / 1,786,001	1.13	0.98
				(0.6)	(0.6)	(1.10-1.17)	(0.95-1.00)
			Outcomes by BP Use Among Antihypertensive Users
			SARS-CoV-2 Test	9,665 / 204,396	2,316 / 204,396	0.23	0.23
				(4.7)	(1.1)	(0.22-0.24)	(0.22-0.24)
			COVID-19 Diagnosis	5,748 / 204,396	1,529 / 204,396	0.26	0.26
				(2.8)	(0.7)	(0.25-0.28)	(0.25-0.28)
			COVID-19 Hospitalization	1,474 / 204,396	385 / 204,396	0.26	0.27
				(0.7)	(0.2)	(0.23-0.29)	(0.24-0.30)
		13	Outcomes by BP Use Among Antihypertensive Non-users
		12	SARS-CoV-2 Test	7,334 / 135,724	1,583 / 135,724	0.21	0.21
		12		(5.4)	(1.2)	(0.20-0.22)	(0.20-0.22)
		12	COVID-19 Diagnosis	3,792 / 135,724	772 / 135,724	0.20	0.22
		12		(2.8)	(0.6)	(0.18-0.22)	(0.20-0.24)
		12	COVID-19 Hospitalization	686 / 135,724	144 / 135,724	0.21	0.27
		12		(0.5)	(0.1)	(0.17-0.25)	(0.22-0.32)
		10
		10

## Sheet: Figure
0	0	23
	0	23
	0	23
0	0	22
	0	22
	0	22
0	0	21
	0	21
	0	21
0	0	19
	0	19
	0	19
0	0	18
	0	18
	0	18
0	0	17		Enter Values Below
	0	17
	0	17			OR	LOWER	UPPER
0	0	15
	0	15
	0	15
0	0	14
	0	14
	0	14
0	0	13
	0	13
	0	13
by HTN Test	0.867361	11		by HTN Test	0.867361	0.859246	0.87564
	0.859246	11		by HTN Dx	0.747291	0.73764	0.756994
	0.87564	11		by HTN InPt	0.976774	0.949899	1.00441
by HTN Dx	0.747291	10		HTN Users Test	0.229581	0.218668	0.240942
	0.73764	10		HTN Users Dx	0.261584	0.24608	0.277898
	0.756994	10		HTN Users InPt	0.266922	0.236573	0.300472
by HTN InPt	0.976774	9		HTN nonUsers Test	0.209465	0.197484	0.222039
	0.949899	9		HTN nonUsers Dx	0.222729	0.204702	0.242028
	1.00441	9		HTN nonUsers InPt	0.267376	0.220138	0.323421
HTN Users Test	0.229581	7
	0.218668	7
	0.240942	7
HTN Users Dx	0.261584	6
	0.24608	6
	0.277898	6
HTN Users InPt	0.266922	5
	0.236573	5
	0.300472	5
HTN nonUsers Test	0.209465	3
	0.197484	3
	0.222039	3
HTN nonUsers Dx	0.222729	2
	0.204702	2
	0.242028	2
HTN nonUsers InPt	0.267376	1
	0.220138	1
	0.323421	1

## Sheet: Sheet2
	OR	LOWER	UPPER
by HTN Test	0.867361	0.859246	0.87564
by HTN Dx	0.747291	0.73764	0.756994
by HTN InPt	0.976774	0.949899	1.00441
HTN Users Test	0.229581	0.218668	0.240942
HTN Users Dx	0.261584	0.24608	0.277898
HTN Users InPt	0.266922	0.236573	0.300472
HTN nonUsers Test	0.209465	0.197484	0.222039
HTN nonUsers Dx	0.222729	0.204702	0.242028
HTN nonUsers InPt	0.267376	0.220138	0.323421
