# Supplementary material for: Association between bisphosphonate use and COVID-19 related outcomes
Source: eLife. 2023 Aug 3;12:e79548. doi: 10.7554/eLife.79548 (PMC10691801; doi:10.7554/eLife.79548)
Supplement: Figure 6—source data 3. [file elife-79548-fig6-data3.xlsx]

## Sheet: Table
			Figure 6, source data 3 for Figure 6D: COVID-19-Related Outcomes by Antidiabetic Use Overall & Sub-Stratified by BP Use
				Incidence of outcome events by drug exposure		Odds of Event
				Number of events / non-user patients	Number of events / user patients	Crude OR (95%CI)	Adjusted OR (95%CI)
				(%)	(%)
			Outcomes by Antidiabetic Use
			SARS-CoV-2 Test	43,103 / 754,553	42,377 / 754,553	0.98	0.92
				(5.7)	(5.6)	(0.97-1.00)	(0.90-0.93)
			COVID-19 Diagnosis	22,924 / 754,553	26,339 / 754,553	1.15	0.88
				(3.0)	(3.5)	(1.13-1.18)	(0.86-0.90)
			COVID-19 Hospitalization	4,670 / 754,553	6,993 / 754,553	1.50	1.13
				(0.6)	(0.9)	(1.45-1.56)	(1.08-1.18)
			Outcomes by BP Use Among Antidiabetic Users
			SARS-CoV-2 Test	3,536 / 79,500	943 / 79,500	0.26	0.26
				(4.4)	(1.2)	(0.24-0.28)	(0.24-0.28)
			COVID-19 Diagnosis	2,732 / 79,500	818 / 79,500	0.29	0.29
				(3.4)	(1.0)	(0.27-0.32)	(0.27-0.32)
			COVID-19 Hospitalization	832 / 79,500	237 / 79,500	0.28	0.29
				(1.0)	(0.3)	(0.24-0.33)	(0.25-0.34)
		13	Outcomes by BP Use Among Antidiabetic Non-users
		12	SARS-CoV-2 Test	3,669 / 72,514	925 / 72,514	0.24	0.25
		12		(5.1)	(1.3)	(0.23-0.26)	(0.23-0.27)
		12	COVID-19 Diagnosis	2,156 / 72,514	526 / 72,514	0.24	0.25
		12		(3.0)	(0.7)	(0.22-0.26)	(0.23-0.28)
		12	COVID-19 Hospitalization	500 / 72,514	120 / 72,514	0.24	0.27
		12		(0.7)	(0.2)	(0.20-0.29)	(0.22-0.33)
		10
		10

## Sheet: Figure
0	0	23
	0	23
	0	23
0	0	22
	0	22
	0	22
0	0	21
	0	21
	0	21
0	0	19
	0	19
	0	19
0	0	18
	0	18
	0	18
0	0	17		Enter Values Below
	0	17
	0	17			OR	LOWER	UPPER
0	0	15
	0	15
	0	15
0	0	14
	0	14
	0	14
0	0	13
	0	13
	0	13
by DIAB Test	0.915029	11		by DIAB Test	0.915029	0.900054	0.930252
	0.900054	11		by DIAB Dx	0.878535	0.859504	0.898077
	0.930252	11		by DIAB InPt	1.12851	1.07939	1.17998
by DIAB Dx	0.878535	10		DIAB Users Test	0.262527	0.242999	0.283342
	0.859504	10		DIAB Users Dx	0.291038	0.267349	0.31651
	0.898077	10		DIAB Users InPt	0.293229	0.251176	0.341059
by DIAB InPt	1.12851	9		DIAB nonUsers Test	0.246696	0.228139	0.266495
	1.07939	9		DIAB nonUsers Dx	0.249874	0.225147	0.276817
	1.17998	9		DIAB nonUsers InPt	0.266522	0.215176	0.330087
DIAB Users Test	0.262527	7
	0.242999	7
	0.283342	7
DIAB Users Dx	0.291038	6
	0.267349	6
	0.31651	6
DIAB Users InPt	0.293229	5
	0.251176	5
	0.341059	5
DIAB nonUsers Test	0.246696	3
	0.228139	3
	0.266495	3
DIAB nonUsers Dx	0.249874	2
	0.225147	2
	0.276817	2
DIAB nonUsers InPt	0.266522	1
	0.215176	1
	0.330087	1

## Sheet: Sheet2
	OR	LOWER	UPPER
by DIAB Test	0.915029	0.900054	0.930252
by DIAB Dx	0.878535	0.859504	0.898077
by DIAB InPt	1.12851	1.07939	1.17998
DIAB Users Test	0.262527	0.242999	0.283342
DIAB Users Dx	0.291038	0.267349	0.31651
DIAB Users InPt	0.293229	0.251176	0.341059
DIAB nonUsers Test	0.246696	0.228139	0.266495
DIAB nonUsers Dx	0.249874	0.225147	0.276817
DIAB nonUsers InPt	0.266522	0.215176	0.330087
