# Supplementary material for: Association between bisphosphonate use and COVID-19 related outcomes
Source: eLife. 2023 Aug 3;12:e79548. doi: 10.7554/eLife.79548 (PMC10691801; doi:10.7554/eLife.79548)
Supplement: Figure 6—source data 4. [file elife-79548-fig6-data4.xlsx]

## Sheet: Table
			Figure 6, source data 4 for Figure 6E: COVID-19-Related Outcomes by Antidepressant Use Overall & Sub-Stratified by BP Use
				Incidence of outcome events by drug exposure		Odds of Event
				Number of events / non-user patients	Number of events / user patients	Crude OR (95%CI)	Adjusted OR (95%CI)
				(%)	(%)
			Outcomes by Antidepressant Use
			SARS-CoV-2 Test	91,570 / 1,536,048	94,958 / 1,536,048	1.04	1.00
				(6.0)	(6.2)	(1.03-1.05)	(0.99-1.01)
			COVID-19 Diagnosis	46,497 / 1,536,048	33,169 / 1,536,048	0.71	0.65
				(3.0)	(2.2)	(0.70-0.72)	(0.64-0.66)
			COVID-19 Hospitalization	7,939 / 1,536,048	6,398 / 1,536,048	0.81	0.75
				(0.5)	(0.4)	(0.78-0.83)	(0.73-0.78)
			Outcomes by BP Use Among Antidepressant Users
			SARS-CoV-2 Test	7,488 / 144,282	2,110 / 144,282	0.27	0.27
				(5.2)	(1.5)	(0.26-0.28)	(0.25-0.28)
			COVID-19 Diagnosis	3,694 / 144,282	1,117 / 144,282	0.30	0.30
				(2.6)	(0.8)	(0.28-0.32)	(0.28-0.32)
			COVID-19 Hospitalization	838 / 144,282	263 / 144,282	0.31	0.33
				(0.6)	(0.2)	(0.27-0.36)	(0.28-0.38)
		13	Outcomes by BP Use Among Antidepressant Non-users
		12	SARS-CoV-2 Test	5,501 / 112,402	1,165 / 112,402	0.20	0.21
		12		(4.9)	(1.0)	(0.19-0.22)	(0.19-0.22)
		12	COVID-19 Diagnosis	3,392 / 112,402	768 / 112,402	0.22	0.23
		12		(3.0)	(0.7)	(0.20-0.24)	(0.21-0.25)
		12	COVID-19 Hospitalization	760 / 112,402	181 / 112,402	0.24	0.27
		12		(0.7)	(0.2)	(0.20-0.28)	(0.22-0.32)
		10
		10

## Sheet: Figure
0	0	23
	0	23
	0	23
0	0	22
	0	22
	0	22
0	0	21
	0	21
	0	21
0	0	19
	0	19
	0	19
0	0	18
	0	18
	0	18
0	0	17		Enter Values Below
	0	17
	0	17			OR	LOWER	UPPER
0	0	15
	0	15
	0	15
0	0	14
	0	14
	0	14
0	0	13
	0	13
	0	13
by DEPR Test	0.997403	11		by DEPR Test	0.997403	0.987775	1.00723
	0.987775	11		by DEPR Dx	0.649144	0.639416	0.659021
	1.00723	11		by DEPR InPt	0.75224	0.726658	0.778645
by DEPR Dx	0.649144	10		DEPR Users Test	0.266762	0.253194	0.280916
	0.639416	10		DEPR Users Dx	0.297661	0.276761	0.319851
	0.659021	10		DEPR Users InPt	0.326574	0.281197	0.378061
by DEPR InPt	0.75224	9		DEPR nonUsers Test	0.205708	0.192184	0.220006
	0.726658	9		DEPR nonUsers Dx	0.230409	0.211612	0.250574
	0.778645	9		DEPR nonUsers InPt	0.26759	0.224877	0.31762
DEPR Users Test	0.266762	7
	0.253194	7
	0.280916	7
DEPR Users Dx	0.297661	6
	0.276761	6
	0.319851	6
DEPR Users InPt	0.326574	5
	0.281197	5
	0.378061	5
DEPR nonUsers Test	0.205708	3
	0.192184	3
	0.220006	3
DEPR nonUsers Dx	0.230409	2
	0.211612	2
	0.250574	2
DEPR nonUsers InPt	0.26759	1
	0.224877	1
	0.31762	1

## Sheet: Sheet2
	OR	LOWER	UPPER
by DEPR Test	0.997403	0.987775	1.00723
by DEPR Dx	0.649144	0.639416	0.659021
by DEPR InPt	0.75224	0.726658	0.778645
DEPR Users Test	0.266762	0.253194	0.280916
DEPR Users Dx	0.297661	0.276761	0.319851
DEPR Users InPt	0.326574	0.281197	0.378061
DEPR nonUsers Test	0.205708	0.192184	0.220006
DEPR nonUsers Dx	0.230409	0.211612	0.250574
DEPR nonUsers InPt	0.26759	0.224877	0.31762
